# Supplementary material for: Intratumoral Heterogeneity Promotes Collective Cancer Invasion through NOTCH1 Variation
Source: MDPI journal article supplement (doi:10.3390/cells10113084), 2021-11-09
Supplement: s1 [file s1]

## **Supplementary Information**

### **Intratumoral Heterogeneity Promotes Collective Cancer Invasion Through NOTCH1 Variation**

Peter Torab,<sup>1</sup> Yue Yan,<sup>2</sup> Mona Ahmed,<sup>2</sup> Hironobu Yamashita,<sup>3</sup> Joshua I. Warrick,<sup>3,4</sup> Jay D. Raman,<sup>4</sup>  
David J. DeGraff,<sup>3,4,5</sup> and Pak Kin Wong<sup>1,2,4,\*</sup>

<sup>1</sup>Department of Mechanical Engineering, The Pennsylvania State University, University Park, PA 16802, USA

<sup>2</sup>Department of Biomedical Engineering, The Pennsylvania State University, University Park, PA 16802, USA

<sup>3</sup>Department of Pathology and Laboratory Medicine, The Pennsylvania State University, Hershey PA 17033, USA

<sup>4</sup>Department of Surgery, Penn State Health Milton S. Hershey Medical Center, Hershey, PA 17033, USA

<sup>5</sup>Department of Biochemistry and Molecular Biology, The Pennsylvania State University, Hershey, PA 17033, USA

\* To whom correspondence should be addressed: pak@engr.psu.edu

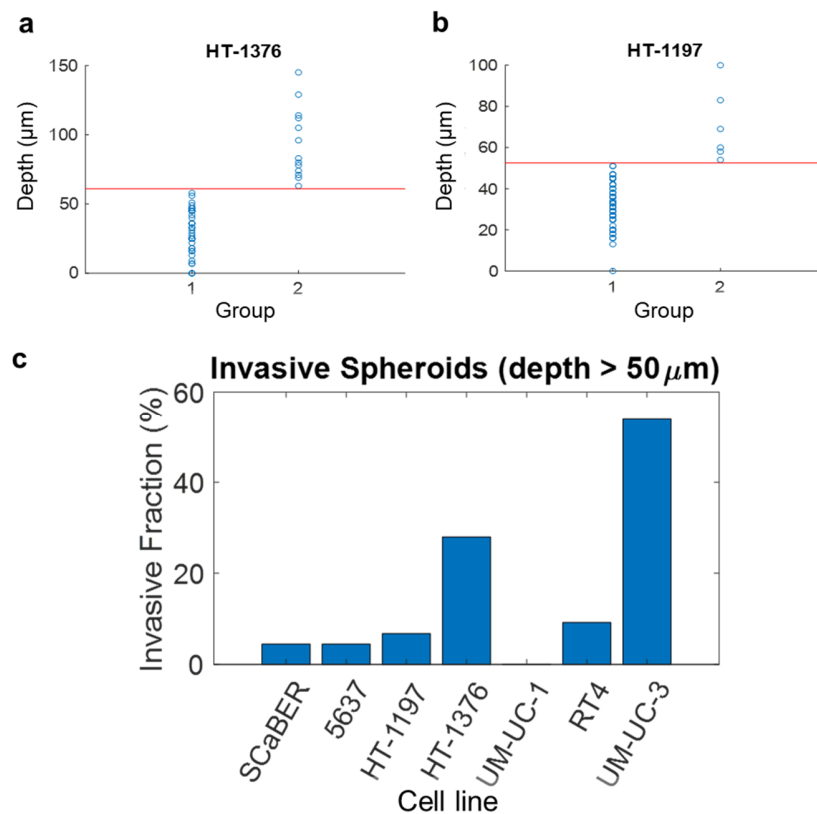

**Figure S1.** Clustering analysis defines the invasive fraction of microtumors in the single layer invasion model. (a-b) K-means clustering results for invasive microtumor depth in the single layer invasion model, 72 hours after seeding ( $k=2$ ). In both cell line, the threshold value was determined to be approximately 50  $\mu\text{m}$ . (c) Fraction of microtumors that invade Matrigel more than 50  $\mu\text{m}$ . SCaBER and RT4 represent the least invasive cell lines in the basal and luminal subtypes, respectively. In addition to the luminal and basal cell lines, UM-UC-3, which is a highly invasive bladder cancer cell line and represents the neuroendocrine-like subtype, was included as a reference. Data are obtained from 3 independent experiments ( $n > 50$  for each case, Chi-square test, \*\*\*\* $p < 0.0001$ ).

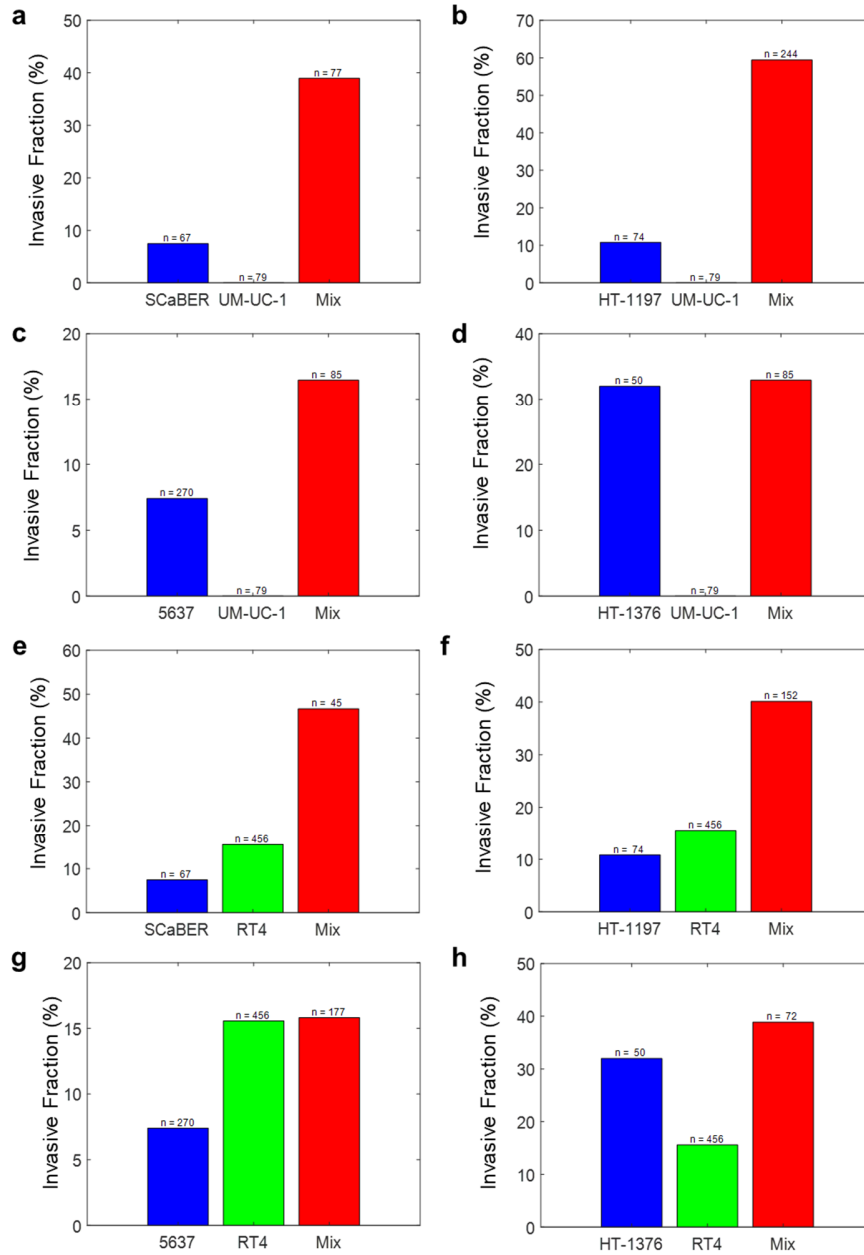

**Figure S2.** Co-culture enhances invasiveness of microtumors compared to individual cell lines. (a-h) Invasive fraction of mixed microtumors vs microtumors formed by individual cells lines. Data are obtained from 3 independent experiments. *n* is indicated in the chart (*n*>45 for each case, Fisher's exact test, \*\*\*\**p*<0.0001 a, b, d, e, f, and h, \*\*\**p*<0.001 for c, and \*\**p*<0.01 for g).

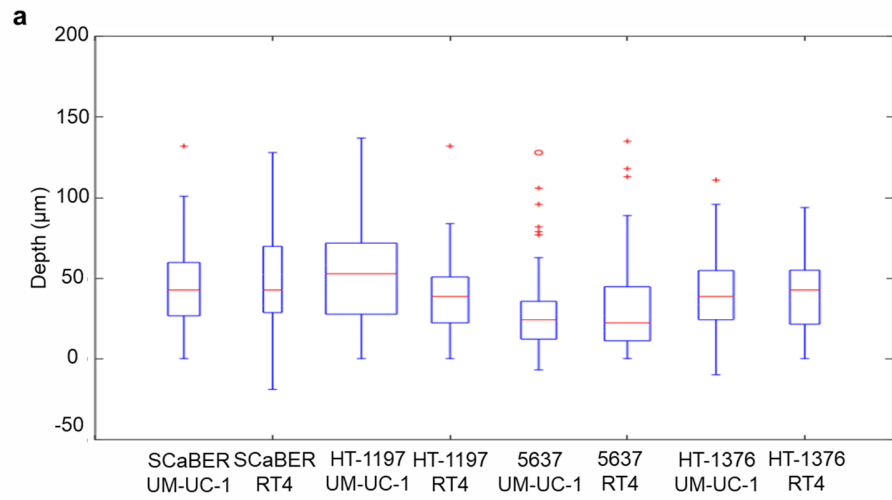

**b**

| Group           | SCaBER RT4 | HT-1197 UM-UC-1 | HT-1197 RT4 | 5637 UM-UC-1 | 5637 RT4 | HT-1376 UM-UC-1 | HT-1376 RT4 |
|-----------------|------------|-----------------|-------------|--------------|----------|-----------------|-------------|
| SCaBER UM-UC-1  | 0.9519     | 0.3760          | 0.6645      | 0.0025       | 0.0047   | 0.9978          | 0.9886      |
| SCaBER RT4      | -          | 0.9996          | 0.1478      | 0.0002       | 0.0004   | 0.6797          | 0.5801      |
| HT-1197 UM-UC-1 |            | -               | 0.0004      | 0.0000       | 0.0000   | 0.0519          | 0.0387      |
| HT-1197 RT4     |            |                 | -           | 0.3083       | 0.4739   | 0.9593          | 0.9929      |
| 5637 UM-UC-1    |            |                 |             | -            | 0.9999   | 0.0207          | 0.0644      |
| 5637 RT4        |            |                 |             |              | -        | 0.0383          | 0.1143      |
| HT-1376 UM-UC-1 |            |                 |             |              |          | -               | 1.0000      |

**Figure S3.** (a) Comparison of invasion depth of mixed microtumors of luminal and basal cells. Data represent mean  $\pm$  SEM ( $n > 45$  for each case, \*\*\*\* $p < 0.0001$ ). (b)  $p$ -values for pairwise comparison. Values below 0.05 are highlighted red. Kruskal-Wallis ANOVA test with Tukey-Kramer post-hoc test.

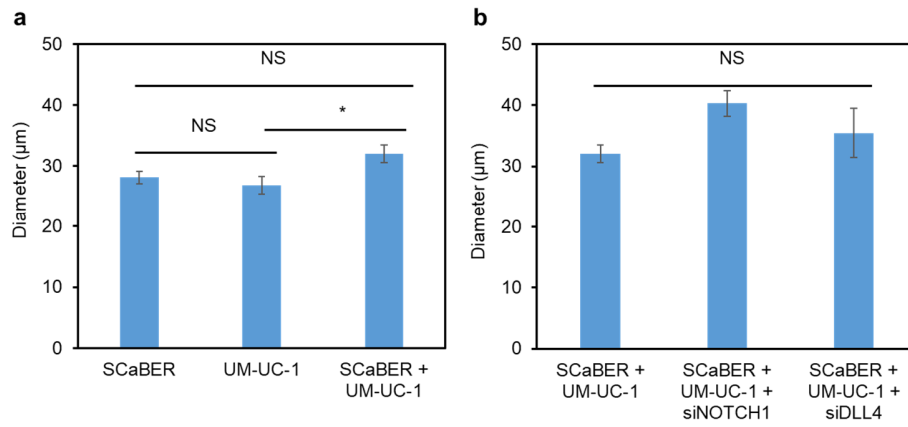

**Figure S4.** Size distributions of homogeneous and heterogeneous microtumors. (a) Both individual cell lines and SCaBER-UM-UC-1 co-culture formed 3D microtumors approximately 30 μm in diameter. Data are representative of 3 independent experiments. (b) NOTCH1 and DLL4 siRNA did not have an effect on the diameter of the SCaBER-UM-UC-1 mixed microtumors. Data represent mean ± SEM ( $n > 45$ , NS  $p > 0.05$ ,  $*p < 0.05$ , Kruskal-Wallis ANOVA test with Tukey's honestly significant difference test).

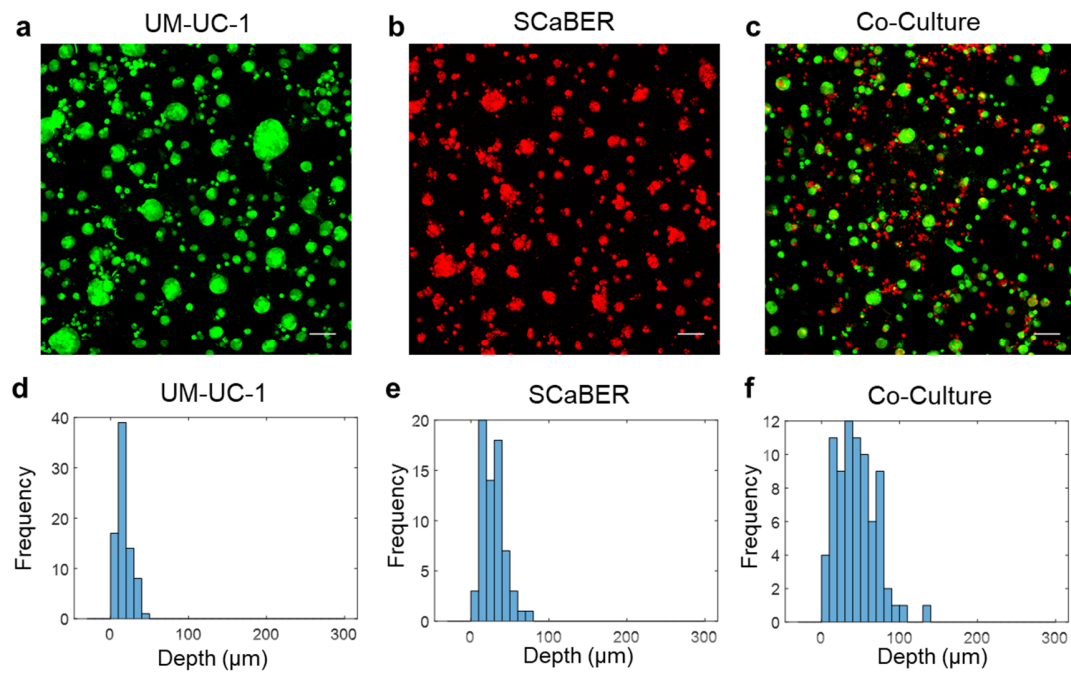

**Figure S5.** SCaBER and UM-UC-1 invasion of Matrigel. (a-c) Vertical projection views of the single layer invasion model. Scale bars, 100  $\mu\text{m}$ . (d-e) Distribution of depth of microtumor invasion into Matrigel. Data are representative of three independent experiments.

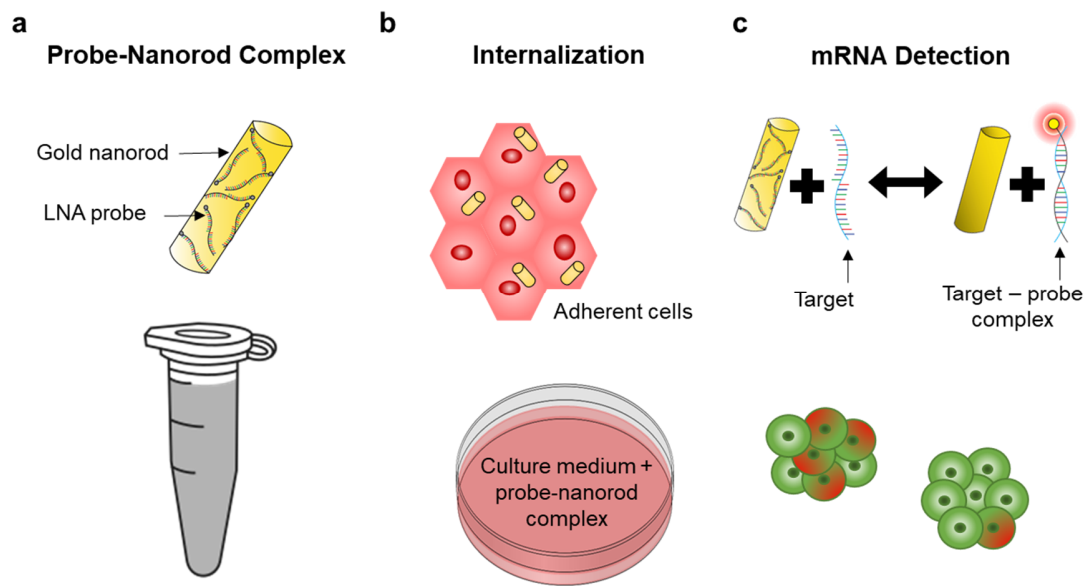

**Figure S6.** Live cell biosensors for measuring NOTCH1 and DLL4 expression in 3D microtumors. (a) Schematic of gold nanorod-locked nucleic acid (GNR-LNA) biosensors. (b) The biosensors are internalized into the cells before microtumor formation to ensure uniform loading among the cells. (c) The cells are then self-assembled on ECM mimicking gel to form 3D microtumors.

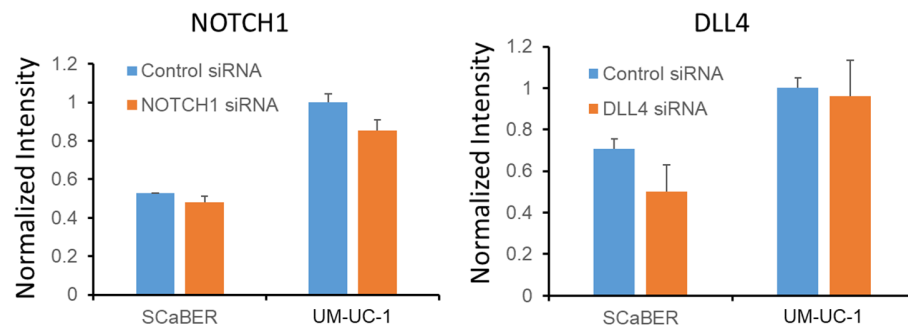

**Figure S7.** Transient knockdown efficiency of NOTCH1 and DLL4 siRNA. Normalized intensity of NOTCH1 and DLL4 biosensors in SCaBER and UM-UC-1 3D microtumors. Data represent mean  $\pm$  SEM and are determined from at least 12 microtumors for each case.

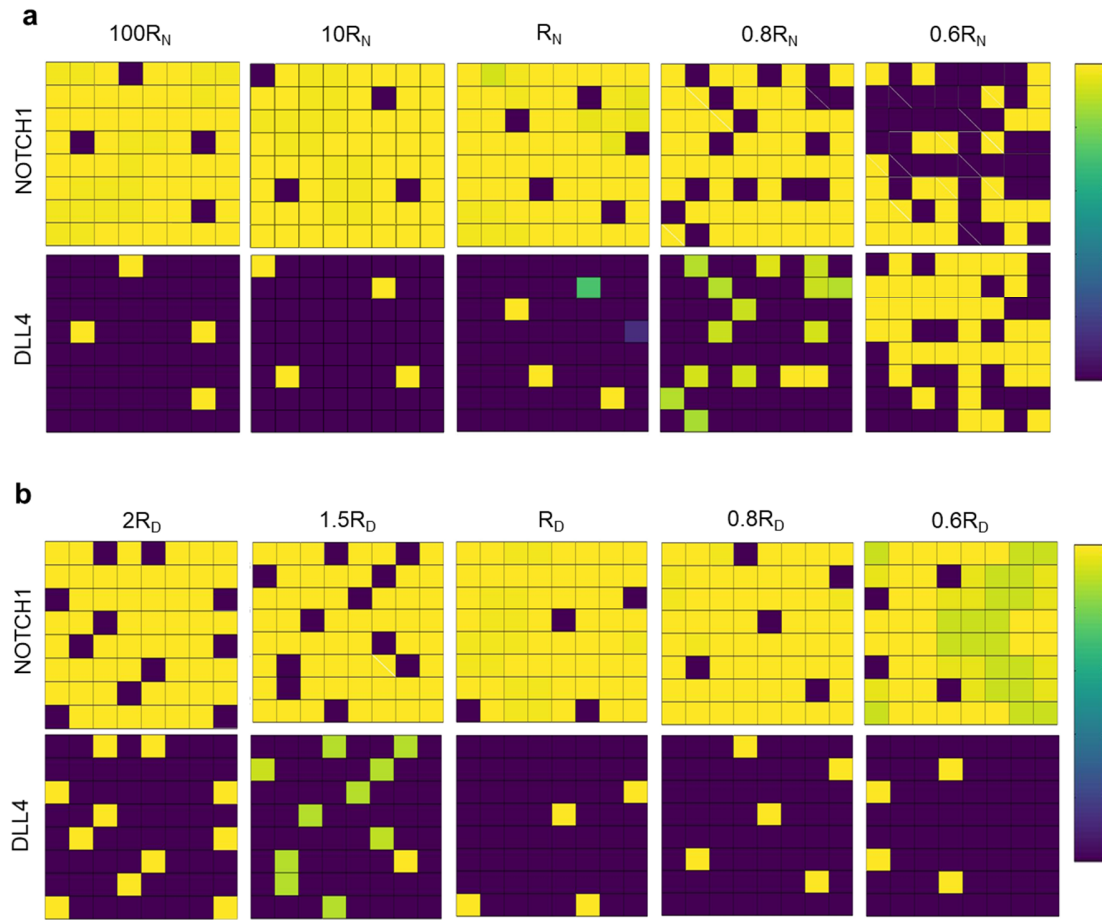

**Figure S8.** Computation modeling of NOTCH1 and DLL4. (a-b) Agent-based model for studying the effects of NOTCH1 and DLL4 on pattern formation. Sensitivity analysis of (a) NOTCH1 production rates  $R_N$  and (b) DLL4 production rate  $R_D$  for evaluating the effects of NOTCH1 and DLL4 production rates on the spatial pattern. The base values of  $R_N$  and  $R_D$  were 0.01.

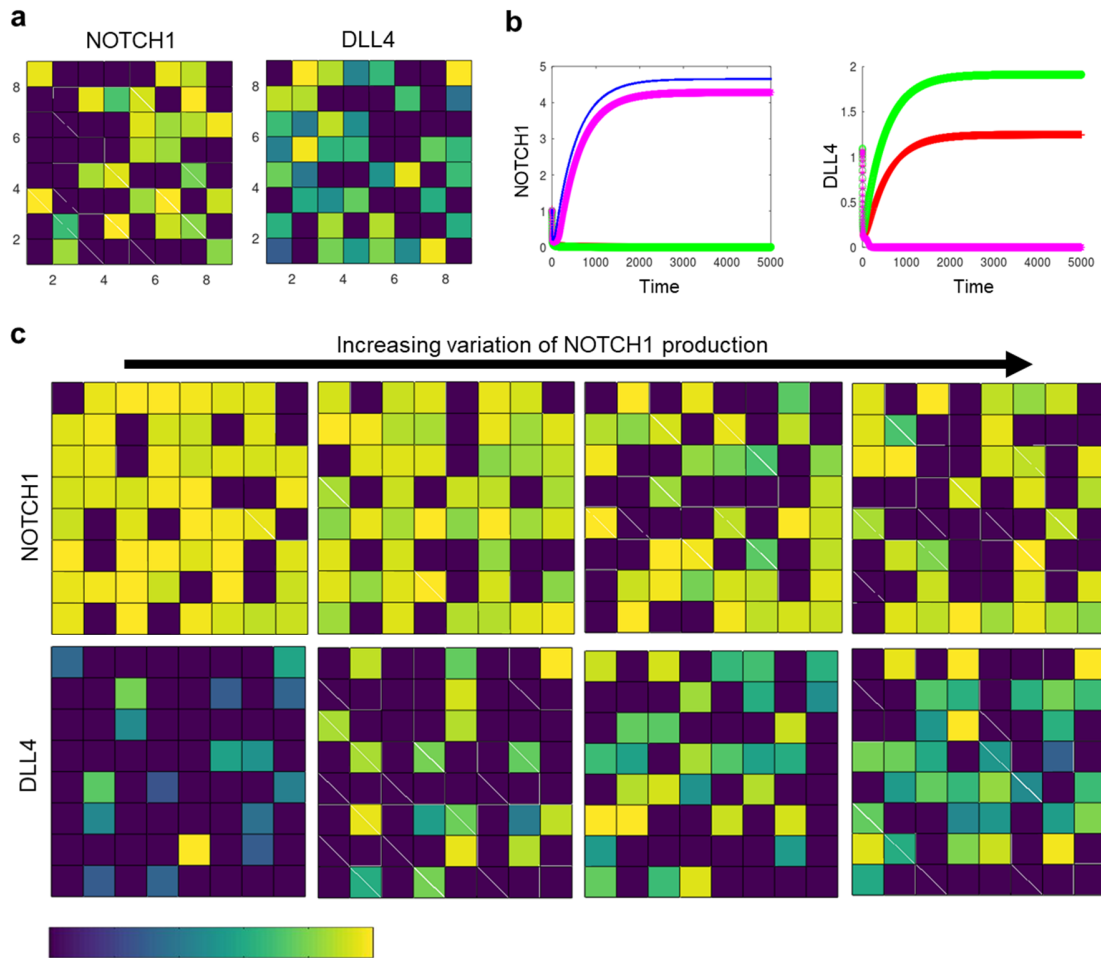

**Figure S9.** Computation modeling of DLL4 expression with variation of NOTCH1 production rate. (a) Introduction of NOTCH1 variation resulted in cluster of DLL4 expressing cells. (b) Tracking of NOTCH1 and DLL4 activities in representative cells committed to NOTCH1 or DLL4 phenotypes. (c) Effects of increasing NOTCH1 variation on DLL4 expression within the microtumor. The color bar shows the level of NOTCH1 and DLL4 in arbitrary units.

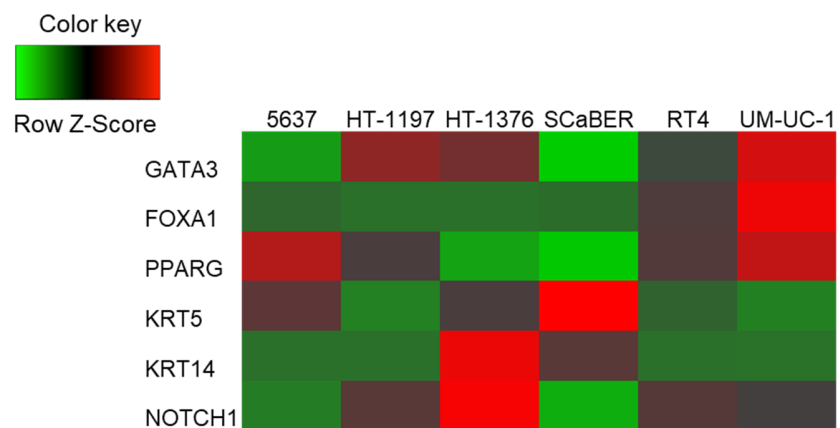

**Figure S10.** Comparison of cancer cell line encyclopedia RNA-seq data for luminal and basal cell lines. RT4 and UM-UC-1 express typical markers of luminal cells (GATA3, FOXA1, and PPARG) while 5673, HT-1197, HT-1376, and SCaBER express typical markers of basal cells (KRT5 and KTR14). These cell lines, such as the UM-UC-1 and SCaBER pair, express distinct levels of NOTCH1 at the transcriptional level.

## Supplementary Tables

**Table S1.** Classification of cell lines based on the consensus classification of MIBC classifier

| Cell line | Classification | cor_pval    | Separation Level | LumP        | LumNS       | LumU        | Stroma-rich | Ba/Sq       | NE-like     |
|-----------|----------------|-------------|------------------|-------------|-------------|-------------|-------------|-------------|-------------|
| 5637      | Ba/Sq          | 7.2123E-38  | 0.893348545      | 0.243010277 | 0.148407183 | 0.214797702 | 0.203685458 | 0.450765564 | 0.25256585  |
| HT-1197   | Ba/Sq          | 1.14627E-29 | 0.760629435      | 0.317086385 | 0.254977757 | 0.315632216 | 0.258204165 | 0.401352433 | 0.265503397 |
| HT-1376   | Ba/Sq          | 1.73258E-42 | 0.684089503      | 0.353514899 | 0.271735141 | 0.322733231 | 0.264430973 | 0.47538817  | 0.216371779 |
| SCaBER    | Ba/Sq          | 3.98863E-49 | 0.842180346      | 0.203077725 | 0.092416082 | 0.128169596 | 0.163858607 | 0.507588991 | 0.127380803 |
| RT4       | LumP           | 2.70353E-71 | 0.487301754      | 0.595295829 | 0.465008717 | 0.492565423 | 0.303953405 | 0.264866974 | 0.168592853 |
| UM-UC-1   | LumP           | 1.29073E-57 | 0.419950298      | 0.544314462 | 0.426945277 | 0.440096918 | 0.393601022 | 0.497786756 | 0.198979927 |

**Table S2.** Chi-square analysis and Fisher's exact test of data in Figure 2e. The conditions include SCaBER homogeneous culture, UM-UC-1 homogeneous culture, and SCaBER-UM-UC-1 co-culture

|                      | SCaBER            | UM-UC-1           | Co-Culture        |
|----------------------|-------------------|-------------------|-------------------|
| Medium interface     | 44 (46.06) [0.09] | 82 (64.12) [4.99] | 29 (44.82) [5.58] |
| Matrigel             | 22 (15.16) [3.09] | 16 (21.10) [1.23] | 13 (14.75) [0.21] |
| Collagen I interface | 4 (7.13) [1.38]   | 3 (9.93) [4.83]   | 17 (6.94) [14.58] |
| Collagen I           | 4 (5.65) [0.48]   | 2 (7.86) [4.37]   | 13 (5.49) [10.25] |

Chi-Square = 51.0895, Degrees of Freedom = 6,  $p = 2.62803e-9$

Values indicate: observed spheroids (expected number) [chi-square statistic]

Pairwise Fisher's exact test.  $*p < 0.05$  SCaBER vs UM-UC-1,  $****p < 0.0001$  SCaBER vs co-culture,  $****p < 0.0001$  UM-UC-1 vs co-culture.

**Table S3.** Chi-square analysis and Fisher's exact test of data in Figure 4c. The conditions include SCaBER-UM-UC-1 co-culture, SCaBER-UM-UC-1 (DLL4 siRNA), SCaBER (DLL4 siRNA)-UM-UC-1, and SCaBER (DLL4 siRNA)-UM-UC-1 (DLL4 siRNA)

|                      | Co-Culture<br>(Control siRNA) | UM-UC-1 KD        | SCaBER KD          | Both KD           |
|----------------------|-------------------------------|-------------------|--------------------|-------------------|
| Medium interface     | 46 (54.84) [1.423]            | 29 (25.18) [0.57] | 21 (20.15) [0.036] | 26 (21.83) [0.80] |
| Matrigel             | 43 (38.21) [0.60]             | 16 (17.5) [0.14]  | 13 (14.04) [15.21] | 13 (15.21) [0.32] |
| Collagen I interface | 9 (4.94) [3.33]               | 0 (2.27) [2.27]   | 2 (1.81) [0.019]   | 0 (1.97) [1.97]   |
| Collagen I           | 0 (0)                         | 0 (0)             | 0 (0)              | 0 (0)             |

Values indicate: observed spheroids (expected number) [chi-square statistic]

Pairwise Fisher's exact test.  $*p < 0.05$  co-culture vs UM-UC-1 KD, NS co-culture vs SCaBER KD,  $*p < 0.05$  co-culture vs both KD

**Table S4.** Chi-square analysis and Fisher's exact test of data in Figure 4d. The conditions include SCaBER-UM-UC-1 co-culture, SCaBER-UM-UC-1 (NOTCH1 siRNA), SCaBER (NOTCH1 siRNA)-UM-UC-1, and SCaBER (NOTCH1 siRNA)-UM-UC-1 (NOTCH1 siRNA)

|                      | Co-Culture<br>(Control siRNA) | UM-UC-1 KD        | SCaBER KD         | Both KD           |
|----------------------|-------------------------------|-------------------|-------------------|-------------------|
| Medium interface     | 46 (42.37) [0.31]             | 13 (14.27) [0.11] | 9 (8.65) [0.014]  | 12 (14.70) [0.50] |
| Matrigel             | 43 (37.61) [0.77]             | 11 (12.66) [0.22] | 4 (7.67) [1.76]   | 13 (13.05) [0.00] |
| Collagen I interface | 9 (7.41) [0.34]               | 0 (2.50) [2.50]   | 0 (1.51) [1.51]   | 5 (2.57) [2.29]   |
| Collagen I           | 0 (10.59) [10.59]             | 9 (3.57) [8.27]   | 7 (2.16) [10.882] | 4 (3.67) [0.029]  |

Chi-Square = 40.04, Degrees of Freedom = 9,  $p = 0.00000746168$

Values indicate: observed spheroids (expected number) [chi-square statistic]

Pairwise Fisher's exact test.  $****p < 0.0001$  co-culture vs UM-UC-1 KD,  $****p < 0.0001$  co-culture vs SCaBER KD,  $***p < 0.001$  co-culture vs both KD

**Table S5.** Chi-square analysis and Fisher's exact test of data in Figure 5b. The conditions include UM-UC-1 WT, FOXA-1 KO, and co-culture

|                      | Wild Type         | FOXA1-KO          | Co-Culture        |
|----------------------|-------------------|-------------------|-------------------|
| Medium interface     | 82 (74.30) [0.80] | 32 (31.02) [0.03] | 18 (26.69) [2.83] |
| Matrigel             | 16 (16.89) [0.05] | 3 (7.05) [2.33]   | 11 (6.07) [4.01]  |
| Collagen I interface | 3 (6.19) [1.64]   | 6 (2.58) [4.51]   | 2 (2.22) [0.02]   |
| Collagen I           | 2 (5.63) [2.34]   | 2 (2.35) [0.05]   | 6 (2.02) [7.83]   |

*Chi-Square = 26.4441, Degrees of Freedom = 6, p = 0.000183981*

Values indicate: observed spheroids (expected number) [chi-square statistic]

Pairwise Fisher's exact test. \* $p < 0.05$  WT vs KO, \*\*\*\* $p < 0.0001$  WT-co-culture, \*\*\* $p < 0.001$  KO vs co-culture

### **Supplementary Movies**

**Movie S1.** Heterogeneous microtumors in 3D microenvironment. Heterogeneous microtumors formed by bladder cancer cells of luminal papillary (UM-UC-1) and basal/squamous (SCaBER) subtypes. The Red: SCaBER; Green: UM-UC-1. 3D microtumors are approximately 50  $\mu\text{m}$  in diameter.

**Movie S2.** Heterogeneous microtumors formed by bladder cancer cells of luminal papillary (UM-UC-1) and basal/squamous (SCaBER) subtypes. The Red: SCaBER; Green: UM-UC-1. 3D microtumors are approximately 50  $\mu\text{m}$  in diameter.

**Movie S3.** Heterogeneous microtumors formed by bladder cancer cells of luminal papillary (UM-UC-1) and basal/squamous (SCaBER) subtypes. The Red: SCaBER; Green: UM-UC-1. 3D microtumors are approximately 50  $\mu\text{m}$  in diameter.
