# Supplementary material for: Intratumoral Heterogeneity Promotes Collective Cancer Invasion through NOTCH1 Variation
Source: Cells. 2021 Nov 9;10(11):3084. doi: 10.3390/cells10113084 (PMC8619970; doi:10.3390/cells10113084)
Supplement: Supplementary file 1 [file cells-10-03084-s001.zip]

Archive with 4 entries (4 files):
- Cells-1335530-Supplementary.pdf
- SuppMovie1-coculture.avi
- SuppMovie2-coculture.avi
- SuppMovie3-coculture.avi
